# Supplementary material for: Synaptic location is a determinant of the detrimental effects of α-synuclein pathology to glutamatergic transmission in the basolateral amygdala
Source: eLife. 2022 Jul 1;11:e78055. doi: 10.7554/eLife.78055 (PMC9286736; doi:10.7554/eLife.78055)
Supplement: Figure 1—source data 1. [file elife-78055-fig1-data1.xlsx]

## Sheet: Figure 1
Pearson correlation coefficient
BLA			cortex			striatum
vGluT1:a-syn	vGluT2:a-syn		vGluT1:a-syn	vGluT2:a-syn		vGluT1:a-syn	vGluT2:a-syn
0.803	0.1639		0.7967	0.1431		0.8269	0.1437
0.8154	0.1665		0.7938	0.1456		0.8259	0.1231
0.7812	0.1628		0.8368	0.0938		0.813	0.2729
0.7873	0.198		0.8267	0.0757		0.7998	0.2579
0.8429	0.1621		0.8217	0.1454		0.8293	0.1496
0.8206	0.1707		0.8391	0.1279		0.8526	0.1547
0.8498	0.2005		0.8084	0.1069		0.8324	0.1182
0.832	0.172		0.8348	0.0923		0.8544	0.1517
0.8453	0.1368
0.8415	0.1479			p value			p value
0.845	0.1899		Mann-Whitney U	0.0002		Mann-Whitney U	0.0002
0.8202	0.1484
0.831	0.1481
0.8094	0.1606
0.7735	0.1737
0.7464	0.1449
0.8287	0.1696
0.8464	0.1854
	p value
Mann-Whitney U	<0.0001
