# Supplementary material for: Synaptic location is a determinant of the detrimental effects of α-synuclein pathology to glutamatergic transmission in the basolateral amygdala
Source: eLife. 2022 Jul 1;11:e78055. doi: 10.7554/eLife.78055 (PMC9286736; doi:10.7554/eLife.78055)
Supplement: Figure 2—source data 1. [file elife-78055-fig2-data1.xlsx]

## Sheet: Figure 2
% of αSyn positive neurons
Figure 2C
Cortex - Layer 5/6	Midline Thalamus	Periventricular Thalamus
82.4	0	8.60215
96.6418	0	21.0526
96.5517	0	30.2885
Dunnett's multiple comparisons test	Below threshold?	Summary	Adjusted P Value
Cortex - Layer 5/6 vs. Midline Thalamus	Yes	****	<0.0001
Cortex - Layer 5/6 vs. Periventricular Thalamus	Yes	****	<0.0001
Intensity of αSyn immunofluorescence
Figure 2D
Cortex - Layer 5/6	Midline Thalamus	Periventricular Thalamus
0.107281		0.00548175
-0.0007367	0	0.00203922
0.0352734	0	-0.00192769
0.0195569	0	0.00801893
-0.0252088	0	0.0302448
0.0350453	0	0.0156637
0.00111408	0	0.0343864
-0.0074563	0	0.0506787
0.031073	0	0.0113048
0.0747985	0	0.0121589
0.052992	0	-2.995e-05
0.0128019	0	0.00025414
0.0206177	0	0.0346219
0.00101221	0	0.00365562
-0.0206827	0	0.00385539
0.0863264	0	0.00520658
0.0817372	0	0.0133907
-0.0004104	0	0.0307806
0.0469682	0	0.0562677
0.0556824	0	0.00891266
0.107588	0	0.0189449
-0.0088932	0	0.028135
0.0423968	0	0.0273417
0.0831527	0	0.00266152
0.120122	0	4.045e-05
0.0285613	0	0.00561728
-0.0116877	0	0.018163
0.111409	0	0.00063984
-0.0145735	0	0.0131007
0.0409044	0	-0.0008736
0.0308856	0	0.00080344
0.0570772	0	0.00407502
0.0589141	0	0.0426238
0.0511424	0	0.0215002
0.0426596	0	0.0732579
0.0683658	0	0.00779286
0.0465366	0	0.00155072
0.0491308	0	0.00334314
0.0939233	0	0.0325093
0.00445051	0	0.00259701
0.0599426	0	0.00114272
0.0460435	0	0.021365
0.137721	0	0.0565401
0.0726406	0	0.0033234
0.0601967	0	-0.00491285
0.0954203	0	0.00276714
0.0705336	0	0.0456627
0.033164	0	0.0397193
0.0358	0	0.0768841
0.0759324	0	0.00934053
0.0431911	0	-0.0020803
0.0513324	0	0.00779926
0.0354354	0	0.00848058
0.0214041	0	0.0127367
-0.0013767	0	0.00364742
0.0488733	0	0.0163008
-0.0027279	0	0.0448583
0.0792523	0	0.0261745
0.106645	0	0.00224173
0.0669161	0	0.00529942
0.081592	0	0.0504908
0.0311244	0	0.0352473
-0.0057842	0	0.0063377
0.0545897	0	-0.00185629
0.0757345	0	0.0184889
0.102325	0	0.0230164
0.0589359	0	0.0172319
0.128325	0	0.00312131
0.134738	0	0.00921493
0.0887679	0	-0.00088958
0.0137571	0	0.0298025
0.0580039	0	-0.0012301
0.00582832	0	0.0194047
0.0383578	0	0.0207305
0.0691158	0	0.0400163
0.0706995	0	0.0104068
0.0334597	0	0.0180623
0.0449003	0	0.00475856
0.0161195	0	0.0172633
0.067929	0	0.00629716
-0.0005265	0	0.0114406
0.0301968	0	0.00470588
0.0482257	0	0.0009062
0.0947728	0	0.0471969
0.0438882	0	0.00255111
0.0566333	0	0.0186921
0.0289116	0	0.0245969
0.0454075	0	0.0143368
0.0352047	0	0.00267187
0.0881009	0	0.0220351
0.117306	0	0.0113268
0.0577275	0	0.00997806
0.0383906	0	0.0119714
0.0919897	0	0.0627044
0.0577873	0	0.00611107
0.0906148	0	0.00416721
0.0821633	0	0.00192253
0.0828152	0	0.00183741
0.0827592	0	0.00678399
0.0191671	0	0.0240265
0.00101017	0	0.0308021
0.0454942	0	0.00553857
0.00766717	0	0.0445547
0.042549	0	0.00077178
0.0468571	0	0.00395603
0.109159	0	0.00520301
0.160239	0	0.00450393
0.0997489	0	0.0347197
0.00950952	0	0.00037096
0.00466867	0	0.0392785
0.0613952	0	0.0452985
0.00054934	0	-0.00161878
-0.0008899	0	0.00582559
0.0435979	0	0.0280706
0.025739	0	0.00132715
0.0736352	0	0.00390025
0.190331	0	0.019967
0.0576971	0	-7.62e-05
0.0652371	0	0.00308569
0.0765121	0	0.0262905
0.0159624	0	0.0526631
0.0758635	0	0.00579121
0.0716709	0	0.00409219
-0.0017997	0	0.00692534
0.0782258	0	0.0536406
0.0759143	0	0.0244221
0.0528014	0	0.00456013
0.0446267	0	0.0113519
0.0789128	0	0.0360416
0.050313	0	0.045378
0.0558824	0	0.0105389
-0.0004003	0	-0.00239773
0.0268774	0	0.0256283
-0.0031204	0	0.0300161
0.0389938	0	0.015584
-0.0138849	0	0.0179634
0.0742056	0	0.124624
0.0880543	0	0.00231559
0.00014269	0	0.0296732
0.0621882	0	0.0244077
0.04789	0	0.0323096
0.0288143	0	0.00306487
0.0231546	0	0.0148096
0.0345613	0	0.010406
0.0275256	0	0.00334679
0.0500628	0	0.0415507
0.0872303	0	0.00872597
0.0773698	0	0.00396839
0.0318069	0	0.0095528
0.0789913	0	0.00741964
0.0522186	0	0.0141097
0.0483102	0	0.0432744
0.131669	0	0.00145833
0.0721101	0	0.0365523
0.0694792	0	0.00190192
0.118186	0	0.0237237
0.0788441	0	0.0212704
0.00154537	0	0.012615
0.109387	0	0.0132998
0.010569	0	0.00318371
0.0614875	0	0.00419534
0.0115943	0	0.0490376
0.0592165	0	0.0100938
0.111629	0	0.00167143
0.0736415	0	0.039755
0.0180907	0	0.00253698
0.0336674	0	0.00513133
0.0762209	0	0.0010139
0.0441412	0	0.00711063
0.0913693	0	0.0310593
0.104953	0	0.00632457
-0.0121922	0	0.0469276
-0.006607	0	0.0043175
-0.0104584	0	0.0192588
0.130961	0	0.00154327
0.0424115	0	0.00496632
0.0321996	0	0.0245789
0.0786472	0	0.0143453
0.0820001	0	0.00833317
0.0964175	0	0.0814927
0.0592352	0	0.00286746
-0.0134759	0	0.0835405
-0.0125571	0	0.0135343
0.0729702	0	0.122097
0.0779631	0	0.00585664
0.00670588	0	0.00534433
0.108314	0	0.0105424
0.123195	0	0.0364767
-0.002676	0	0.0233638
0.0667567	0	0.0367591
0.0583641	0	0.00407592
0.010329	0	0.0330242
0.016831	0	0.0175797
-0.0016235	0	0.00445454
0.0664783	0	0.0511167
0.080689	0	0.0192739
-0.0167368	0	0.0157382
-0.0083865	0	0.00430564
0.0578796	0	0.00147128
0.0803944	0	0.0474919
0.0315721	0	0.00376553
0.00089776	0	0.0468572
0.053135	0	0.00314235
0.104341	0	0.0223739
0.0641026	0	0.0112074
0.118072	0	0.00225286
0.053733	0	0.00621187
0.0742347	0	0.00508262
0.118339	0	0.015128
0.0875237	0	0.0100557
0.0773026	0	0.0694023
0.0498679	0	0.00395454
0.0607426	0	0.00238254
0.0984238	0	0.00319135
0.0993413	0	0.0323529
0.117151	0	0.0142628
0.0910849	0	0.0470469
0.102673	0	0.00902181
0.0133892	0	0.00780831
-0.01533	0	0.00370807
0.0280294	0	0.00424242
-0.022224	0	0.00720218
0.126152	0	0.00418301
-0.0137563	0	0.0447094
0.0638139	0	0.0542809
0.0843595	0	0.00942922
0.00356067	0	0.0197139
0.0806907	0	0.0351391
0.0171757	0	0.0578752
0.0585111	0	0.0333119
0.00506536	0	0.00543978
0.0717243	0	0.0234023
0.0678208	0	0.0187071
0.146783	0	0.0579234
0.0648639	0	0.0228606
0.125775	0	0.0026128
0.11871	0	0.00583869
0.0853533	0	0.0105375
0.017877	0	0.00394924
0.103016	0	0.0184744
-0.0003364	0	0.00277526
0.0113683	0	0.00528441
0.00857091	0	0.00745098
0.0101688	0	0.0535551
0.0905878	0	0.0375288
0.0418788	0	0.00636517
0.135359	0	0.00461599
-0.0025054	0	0.036968
0.0244851	0	0.00662976
0.118637	0	0.0126327
0.0229198	0	0.00657539
0.00022759	0	0.00623689
0.0150448	0	0.00877311
0.0204504	0	0.0177495
0.00709516	0	0.0415369
0.0299729	0	0.0455137
0.00954794	0	0.00463523
0.00720152	0	0.0139591
0.0562619	0	0.112638
0.0101604	0	0.00591281
0.0819385	0	0.0338949
0.0853873	0	0.00501436
-0.0146892	0	0.250886
0.0444266	0	0.00748144
0.0307509	0	0.0263738
-0.0022049	0	0.0372248
0.0621343	0	0.0777376
0.00372152	0	0.0144209
0.0426213	0	0.00958215
0.00529485	0	0.00634409
0.0322945	0	0.048933
0.0838931	0	0.00938814
-0.0140689	0	0.0122523
0.0329132	0	0.0153125
0.0237487	0	0.0439136
0.0293819	0	0.0379685
0.0132396	0	0.054908
0.0020794	0	0.0203286
0.00507587	0	0.0430094
-0.0146958	0	-0.004176
0.018481	0	0.0190752
0.0304629	0	0.00531878
0.0286775	0	-0.0008891
0.0747972	0	-0.00277285
0.0126517	0	-0.00438932
-0.0100509	0	-0.00486666
0.0257489	0	0.00315945
0.0114241	0	0.0622981
0.0374822	0	-0.00150746
0.0803416	0	0.00362676
0.0589175	0	-0.00400784
-0.0038818	0	-0.00029223
0.065326	0	-0.0052673
-0.0042115	0	-0.00325525
0.0552188	0	-0.00084976
-0.0089303	0	0.0103596
0.00876906	0	-0.0041139
0.0342638	0	-0.00177286
0.0876063	0	-0.00200876
0.0346339	0	0.00498717
0.0323372	0	-0.00562893
0.0512574	0	0.00795356
0.0878782	0	-0.00028658
0.0146692	0	0.0194788
0.0763541	0	0.00374543
-0.0027287	0	0.0112363
0.026798	0	-0.00422532
0.031203	0	0.00207022
0.0251647	0	-0.00491858
0.0962151	0	0.00118726
0.0297568	0	-0.0012799
0.0190865	0	-0.00433894
0.0541698	0	0.00717156
0.0475381	0	0.00757513
-0.0029282	0	-0.00057246
0.0559496	0	-0.00396838
0.0562891	0	-0.00275771
0.00515455	0	0.00246632
0.00753276	0	-0.00429667
0.0189091	0	0.00166138
0.044571	0	0.00042005
0.0239269	0	0.00369862
-0.0051691	0	0.0104111
0.0491431	0	0.00849477
0.0279726	0	0.0124679
0.00510464	0	0.00045805
0.0241947	0	0.00388434
0.0712085	0	-0.0045522
0.0175806	0	0.0124154
0.025282	0	-0.00261154
0.0474059	0	-0.00300511
0.0472911	0	-0.00277992
0.0689729	0	0.00559897
0.0507991	0	0.00025825
0.0852232	0	0.00081536
0.0442638	0	-0.00398122
0.00166896	0	-0.00360146
0.0558533	0	0.0138968
0.079585	0	-0.00133838
0.0354952	0	0.00413705
0.0501873	0	-0.00412387
0.0696565		0	0.0155406
0.0563913		0	0.00025766
0.0814828		0	0.00104597
0.0223569		0	-0.00258661
0.0664687		0	-0.00054981
0.020055		0	0.00191214
0.0253805		0	-0.0032019
0.0532996		0	0.0217162
0.109323		0	0.0043256
0.128263		0	-0.00257401
0.0317319		0	0.00034007
0.0251691		0	0.00167558
0.0320572		0	-0.00398268
-0.0084275		0	-0.00374495
0.00295411		0	-0.00229221
0.0404893		0	-0.00266575
0.00709043		0	-0.00168827
0.0702263		0	0.00395989
0.0448751		0	-0.00145357
0.0478698		0	-0.00173602
0.0430603		0	0.00026621
0.00671714		0	0.00070805
0.0492528		0	-0.00127752
0.0651838		0	0.00274877
0.029562			-0.00096687
0.0501376			-0.00128459
0.0186808			0.011314
0.0468773			0.00769981
0.00998821			-0.00191066
0.0202094			-0.00062235
0.038008			0.00445759
0.0474309			0.00128489
0.0426779			0.0252976
0.0818958			-0.00105637
0.0398179			0.0116633
0.00350603			0.00268256
0.0422827			0.00098669
0.0298343			-0.00065602
0.0395683			0.00722854
0.0397249			0.00522015
0.0300581			-0.00247165
0.0792097			0.0025686
0.0280261			-0.00189827
0.0852659			-0.00414545
0.0904165			0.00316905
0.0444571			-0.00332523
-0.0009638			-0.00185444
-0.0088203			-0.0044684
0.00194047			-0.00101892
0.0197575			-0.00234843
0.0308269			0.00392072
0.0158414			0.00474425
0.0266078			-0.00802041
-0.0042842			0.00282395
-5.265e-05			-0.00304797
0.022557			-0.0016241
0.073999			-0.00155753
-0.007289			-0.00404106
0.0347548			0.00863037
0.0464882			-0.00310381
0.0174211			1.669e-05
0.0574095			-0.00252295
0.0477812			-0.00839621
0.0879068			-0.00291251
-0.0104353			-0.00106259
0.0218527			0.00097523
0.0474217			-0.00031706
-0.0157308			-0.00487043
-0.0150327			-0.00238415
0.0107979			-0.00494553
-0.0206505			0.00022338
-0.0003764			-0.00907227
0.0623023			-0.00094312
0.0173381			-0.00213042
-0.0135872			0.0028263
-0.0050444			0.0373293
-0.0256257			0.00169775
0.00586321			-0.00115117
0.0591049			-0.00760698
-0.0053043			-0.0066221
0.0868546			-0.00357547
0.0676581			-0.0017709
0.0326335			0.00681259
0.0118712			-0.00108372
0.0401003			0.0005114
0.0128163			-0.00081782
0.00158763			0.00630418
0.0243072			-0.00702529
0.0474403			-0.00348942
0.020607			0.00099193
0.031662			0.0115786
0.100719			0.03629
0.00018992			0.00576862
0.046284			-0.00314801
-0.0160175			0.00670683
-0.0012077			0.0063343
0.0194373			0.0466562
0.0593661			-0.00193246
0.0215039			-5.919e-05
0.0360885			0.00039081
0.0386259			-0.00061481
0.0644261			-0.00416925
0.00988367			-0.00345499
0.0646192			-0.00212772
0.0335973			0.0007076
0.0702481			0.00667467
-0.0058665			0.0479875
-0.0065503			-0.00220924
0.0152792			0.00245062
0.0579155			-0.00122271
0.0582275			-0.0002402
0.0980231			0.0004284
0.0854062			0.00392803
0.0234921			0.00324846
0.0650316			-0.00052606
0.00351659			0.00553399
0.0857064			0.0159553
0.0150033			0.00506551
-0.0050168			-0.00186502
-0.0120363			-0.00308208
0.0400105			0.0211596
0.0711618			-2.047e-05
0.0357177			0.0143772
0.0532111			-0.00118322
0.0265135			-0.00019608
0.0459286			-0.00524629
0.021943			-0.00164429
-0.0173936			0.00826216
-0.0205923			0.00294174
0.0668005			0.0576674
0.0420481			0.00090067
0.0285718			0.0375294
0.0268872			-0.00083359
-0.0022357			-0.00045944
0.0303723			0.0301766
0.0292845			0.0048206
-0.0049623			0.00674136
0.0144258			-0.00037084
0.0540946			0.0103423
0.0793728			0.00215444
0.0256142			-0.00179942
-0.0016722			0.00832929
0.0452741			0.00763001
0.0936			0.00052041
-0.021644			0.0114329
0.0399977			0.00060179
0.0761989			0.00233138
-0.0013908			0.0354144
-0.0129876			0.00095297
0.0434319			0.0106335
0.0584704			-0.0008706
0.0911195			-0.00055141
0.0325275			0.0142839
0.0469084			0.0103161
-0.0038795			0.00315779
0.0385338			0.00124533
0.0302983			0.00771351
-0.00472			0.00559527
-0.0008643			0.00117852
-0.0085018			0.00463866
-0.023868			0.0226224
0.0736882			0.00317217
-0.0275345			-0.00306816
-0.0082442			0.0020362
0.0289719			-0.00463725
0.0485197			0.00215309
-0.0009546			0.0017479
0.0309506			-0.00095452
0.0163438			0.0011045
-0.0176973			0.0163685
0.0160482			-0.00198939
-0.0232729			-0.00187748
-0.0023703			0.00212769
-0.0196898			0.00240896
-0.0089999			0.00721046
0.00798812			0.00211078
0.00855476			0.00166597
-0.0089704			-0.00464146
0.0123586			0.00815663
0.0930854			-0.00053886
0.0122583			0.00177315
0.0095039			8.061e-05
0.0529091			0.00593663
0.00115304			-0.00187078
0.0784787			-0.0022179
0.0136291			0.00749925
0.023017			0.00433646
0.070776			0.0054293
-0.0087891			0.00559431
0.00634961			0.00816509
0.0430337			0.0082094
0.0178716			0.0104765
0.0451028			0.00476218
-0.0156548			0.0120023
-0.000296			0.0108979
0.0392503			0.0293014
0.0123535			0.0105498
-0.0101522			0.0112447
0.0111648			0.0113509
0.0760953			0.0156747
0.0667912			0.0286025
0.124996			0.00821456
0.125315			0.00624788
0.0103729			0.00482291
2.6498e-05			0.0208388
0.0661622			0.00520389
0.0597595			0.0155658
-0.0095392			0.0477981
0.0305189			0.0259849
-0.0013735			0.00908599
0.0842321			0.00804206
-0.0051729			0.0864323
0.045703			0.0143
0.00080543			0.00011143
0.0175823			0.0132166
0.0751088			0.017511
0.0639246			0.00635846
0.0296508			0.0204528
-0.0111568			0.0141082
-0.0038052			0.0003966
0.0205102			0.0105702
0.0352074			0.0195865
0.135854			0.0120143
0.0964143			0.00930056
0.0200764			0.00604961
0.0415955			0.0119366
-0.0113657			0.00550556
0.0318362			0.0124954
0.156539			0.00578208
0.049013			0.00543184
0.0593572			0.0215145
0.0259631			0.00466825
0.0493796			0.0108443
0.0167647			0.0106446
0.0277018			0.00972032
0.0777914			0.0398233
0.0901514			0.0130724
0.0322226			0.0104203
0.0422441			0.018987
-0.0062576			0.00720588
0.00398523			0.0192955
0.0700616			0.0262993
0.0391416			0.00754465
0.0622804			0.0106486
0.00099226			0.0197117
0.057589			0.0301861
-0.0128935			0.0141407
-0.0047154			0.0307458
0.0104862			0.00240666
-0.0166239			0.0245083
0.0268628			0.00746074
0.0653652			0.01811
0.0415766			0.0281716
-0.0050011			0.0104472
0.0305202			0.0106175
0.0759218			0.0130347
0.0924216			0.0473825
0.00451134			-0.00032336
0.0853922			0.0161302
0.0438637			0.00390461
0.0505089			0.0222388
0.0563123			0.0173036
0.0668179			0.0162384
0.0749617			0.00580087
0.014451			0.0125686
-0.008127			0.0191795
0.0715748			0.0187919
0.125173			0.0086364
0.0623786			0.00757982
0.0715083			0.0126758
0.0100963			0.0185344
0.0279655			0.0134118
0.0322228			0.0188876
0.0496679			0.00281848
-0.0163234			0.013433
0.0710675			0.00912365
0.0824487			0.00224106
0.035772			0.0302511
0.0901158			0.0164146
-0.0032148			0.0067954
0.0640727			0.012951
0.0488891			0.00232785
0.0886671			0.00282609
0.0688011			0.0186684
0.0394467			0.00739464
0.0655915			0.00324769
0.108961			0.00411946
0.107036			0.0130113
0.0501794			0.0224408
0.0630738			0.0136991
0.0330207			0.0201844
-0.0033589			0.00512167
0.0318836			0.0220221
0.137609			0.00419619
0.105856			0.00611259
0.0972746			0.00585139
0.118692			0.00935815
0.0108372			0.0148677
0.0403705			0.0160228
0.0840438			0.00368297
0.0107547			0.0234574
0.100845			0.0131532
0.0156656			0.0139737
0.0591971			0.0147231
0.11582			0.0150227
0.0800952			0.00355169
0.0707942			0.0201081
0.0213138			0.00525952
0.0861904			0.00947001
0.0830453			0.0133139
0.0536382			0.0236882
0.058007			0.00520066
-0.009			0.0112433
0.0376412			0.0193102
0.108117			0.0137144
0.134314			0.00340892
0.073221			0.0184208
0.0281493			0.0223289
0.0907728			0.0136666
0.0989406			0.0192522
0.112807			0.00988038
-6.827e-05			0.0407345
0.0875772			0.0323383
0.11959			0.00975713
0.0432249			0.0157034
0.0725742			0.011252
0.0315525			0.015271
-0.004902			0.0146198
0.0692789			0.0242522
0.0588045			0.0232642
0.0890133			0.0220523
0.0572964			0.0779931
-0.0008772			0.00475714
0.0126697			0.0151101
0.0763972			0.0271794
0.0252668			0.0604337
0.0724723			0.0158326
0.0716444			0.0253672
-0.0006791			0.0229601
-0.0020487			0.0187896
0.0145681			0.0124284
0.0753171			0.0162391
0.0894925			0.0268458
0.00868702			0.0150478
0.0671433			0.0228909
0.0955191			0.013324
0.0329501			0.010958
0.089397			0.00812036
0.0633556			0.0115029
0.0949504			0.0201914
0.0964899			0.0128788
-0.0085936			0.010454
0.0657657			0.00661844
0.131913			0.0216272
-0.0078838			0.0135286
-0.0114471			0.0174971
0.0356537			0.0232445
0.12562			0.010034
0.0733283			0.0292038
0.0407304			0.0119157
0.121062			0.00791198
0.104949			0.0125021
0.0485639			0.0172432
0.0563235			0.0133394
0.106326			0.0247855
0.0858243			0.00632946
-0.0162881			0.0158813
0.0303863			0.0109986
0.048051			0.0211821
-0.0100245			0.00950089
0.142999			0.00680659
0.0619684			0.0150854
0.113569			0.0135798
0.0737983			0.020956
-0.0041012			0.0124447
0.135937			0.0169342
0.0829745			0.0154986
0.0537611			0.0276326
-0.0061303			0.0260697
0.0501712			0.0162362
0.00150443			0.00908263
0.104783			0.0189713
0.0658299			0.0267563
0.0417276			0.0271609
-0.0215525			0.0191213
0.158575			0.0201322
0.144715			0.0196642
-0.0177124			0.0217464
-0.0132777			0.0260293
-0.0057647			0.0386917
-0.0087388			0.0346499
-0.0032437			0.0231808
0.0415566			0.0160517
0.0343468
-0.0194101
0.023067
-0.0040075
0.0364528
0.0391437
0.106958
-0.0221426
Dunnett's multiple comparisons test	Below threshold?	Summary	Adjusted P Value
Cortex - Layer 5/6 vs. Midline Thalamus	Yes	****	<0.0001
Cortex - Layer 5/6 vs. Periventricular Thalamus	Yes	****	<0.0001
