# Supplementary material for: Synaptic location is a determinant of the detrimental effects of α-synuclein pathology to glutamatergic transmission in the basolateral amygdala
Source: eLife. 2022 Jul 1;11:e78055. doi: 10.7554/eLife.78055 (PMC9286736; doi:10.7554/eLife.78055)
Supplement: Figure 3—figure supplement 1—source data 1. [file elife-78055-fig3-figsupp1-data1.xlsx]

## Sheet: Figure 3_supplementary 1
Supplementary 1D to Figure 3
EPSC at 30 μA stimulation				EPSC at 60 μA stimulation				EPSC at 120 μA stimulation
control	PFFs			control	PFFs			control	PFFs
30.657	105.21			42.6729	215.124			126.109	338.238
34.8779	67.5449			83.9327	137.797			383.724	334.28
72.4301	130.804			148.013	300.115			196.303	419.981
164.396	9.17091			284.29	140.408			518.466	481.481
77.5654	9.7496			122.527	142.966			267.279	233.225
61.1823	6.76769			215.66	127.516			382.869	316.621
9.10728	4.03603			11.2637	7.57607			133.224	222.715
18.2162	6.89846			15.8304	16.5537			95.3723	122.766
52.3788	60.5231			113.96	87.0534			196.067	158.969
16.2979	35.5676			20.1226	64.5901			175.58	135.875
51.9276	15.1579			179.115	113.193			322.111	242.02
75.0081	88.1038			162.392	216.284			504.675	305.301
p	>0.05			p	>0.05			p	>0.05
