# Supplementary material for: Synaptic location is a determinant of the detrimental effects of α-synuclein pathology to glutamatergic transmission in the basolateral amygdala
Source: eLife. 2022 Jul 1;11:e78055. doi: 10.7554/eLife.78055 (PMC9286736; doi:10.7554/eLife.78055)
Supplement: Figure 3—source data 1. [file elife-78055-fig3-data1.xlsx]

## Sheet: Figure 3E,G
Figure 3E
EPSC amplitude at 30 μA stimulation				EPSC amplitude at 60 μA stimulation				EPSC amplitude at 120 μA stimulation
control	PFFs			control	PFFs			control	PFFs
78.2185	71.0096			368.399	104.741			647.936	140.675
111.757	30.8978			537.588	77.8788			891.553	91.059
58.0991	157.852			321.521	330.236			959.9	436.702
72.0262	40.5666			277.77	65.9472			523.231	73.1665
294.369	86.8468			413.561	184.711			545.895	204.446
155.013	76.9333			248.07	605.021			392.954	1118.6
118.137	124.546			199.52	177.098			792.085	134.566
117.276	37.2022			343.833	96.3467			422.26	149.046
55.0751	53.251			104.511	159.726			89.3061	169.553
46.9777	80.1848			201.947	170.545			256.949	173.613
139.111	120.57			181.296	303.346			728.541	352.236
24.6929	25.4333			242.229	160.695			744.719	491.012
52.8563	44.9002			82.9856	57.4482			160.899	202.82
139.233	0			292.886	0			507.503	8.7388
118.697	0			287.076	5.53473			984.962	5.35086
39.5094	4.70359			95.6536	10.0901			218.377	15.8252
24.2145	31.8656			25.7108	196.214			143.59	405.909
	p value				p value				p value
Mann-Whitney U	0.0837			Mann-Whitney U	0.02			Mann-Whitney U	0.0026
Figure 3G
EPSC amplitude at 30 μA stimulation				EPSC amplitude at 60 μA stimulation				EPSC amplitude at 120 μA stimulation
control	PFFs			control	PFFs			control	PFFs
68.7061	113.809			698.002	146.441			747.404	92.5849
49.7599	68.8403			62.5914	99.9174			62.0245	93.892
247.48	71.1089			588.621	58.7544			1364.23	91.8447
83.3303	45.8301			396.35	26.451			747.488	254.2
144.587	72.3262			282.892	534.325			370.828	840.188
29.7566	243.225			88.6788	568.98			145.973	1186.77
331.185	107.333			1132.22	748.986			1403.71	951.177
109.062	373.202			308.805	636.274			1212.33	1104.47
66.9494	103.309			69.2336	97.9376			95.4708	128.383
49.3913	63.7973			75.8199	131.159			127.656	149.671
111.097	55.9521			322.056	124.883			392.728	468.785
77.3204	27.4126			134.799	56.6194			474.313	131.331
41.2572	30.2992			105.398	134.328			170.897	369.249
7.83222				22.0098				65.2092
5.75564				44.75				47.8967
6.53929				43.9884				222.889
21.9956				56.5403				196.472
	p value				p value				p value
Mann-Whitney U	0.41			Mann-Whitney U	0.68			Mann-Whitney U	>0.9999

## Sheet: Figure 3K,O
Figure 3K
EPSC amplitude at 0.75 mW/mm2				EPSC amplitude at 1.5 mW/mm2				EPSC amplitude at 2.3 mW/mm2				EPSC amplitude at 3 mW/mm2				EPSC amplitude at 3.6 mW/mm2				EPSC amplitude at 4.0 mW/mm2
control	PFFs			control	PFFs			control	PFFs			control	PFFs			control	PFFs			control	PFFs
6.34268	25.4175			23.5021	45.1442			32.8461	86.5913			36.3365	104.337			36.8642	257.913			36.6874	269.474
10.9223	19.3669			14.094	165.882			61.9516	415.501			83.0035	580.935			118.6	700.253			121.659	821.149
8.21002	17.3697			51.4886	43.2536			91.2747	88.0932			100.584	155.67			150.968	181.284			164.284	231.461
16.6007	131.285			21.7634	443.158			16.5953	727.485			13.7416	936.977			31.6218	1040.7			29.967	1202.71
9.62373	81.5705			11.5482	207.43			31.2919	440.541			58.1222	757.067			68.8825	913.481			83.3508	898.059
111.452	0			445.014	0			734.019	0			791.195	0			901.416	0			958.936	0
200.545	0			326.193	0			467.286	0			668.083	0			740.758	0			825.464	0
9.47271	284.847			26.9546	322.075			47.8492	522.519			61.5256	577.292			66.8549	843.504			61.9713	769.982
145.718	213.645			411.531	322.978			682.845	335.668			739.828	333.508			787.177	337.096			871.941	339.408
9.24104	16.6693			60.8888	34.1769			94.1975	68.0687			345.137	157.779			403.193	249.307			630.524	266.233
25.4772	40.8428			33.3947	337.234			46.9641	646.311			54.6716	1103.71			97.3494	1158.59			90.5352	1288.71
183.767	130.204			221.598	331.714			198.989	760.849			208.027	852.168			209.315	907.13			261.83	868.735
33.0011	0			64.1817	0			75.2073	0			286.475	0			331.938	0			400.91	0
19.5082	21.798			382.825	31.6693			581.015	25.1424			647.524	45.7084			686.135	71.6131			710.465	66.8822
27.5522	8.71012			197.332	15.6565			389.76	45.2859			597.769	44.6033			702.986	61.5168			643.712	68.2627
401.915	8.83717			1022.66	6.05707			1531.97	14.5362			1531.24	26.7867			1588.49	37.3354			1573.93	36.3018
244.544	0			452.13	0			499.247	0			495.341	0			605.02	0			724.143	0
42.198	10.4738			71.3229	15.7999			251.742	18.6425			247.96	19.7668			318.077	26.7122			315.127	24.2532
11.2609	0			35.3545	0			100.249	0			170.822	0			296.738	0			255.523	0
111.755	0			278.735	0			317.053	0			316.486	0			336.87	0			351.143	0
28.7401	22.8949			68.3206	73.138			79.247	96.3515			395.324	98.4817			422.768	133.574			348.316	126.725
59.6782	56.3415			288.426	68.2133			452.772	131.565			589.46	171.523			777.665	239.789			804.168	294.051
214.492	245.354			645.63	423.601			1285.07	446.497			1590.89	665.123			1675.38	812.435			1711.77	807.096
312.77	18.5311			555.332	43.4784			783.811	21.8387			924.275	12.3961			1214.04	24.3101			1383.92	23.6557
413.325	84.8058			795.078	140.847			1228.64	188.551			1315.87	210.378			1419.52	209.407			1474.25	197.882
356.399	4.40974			979.327	5.54679			1159.84	30.4602			1253.61	207.111			1291.71	442.846			1407.69	810.366
600.434	8.90145			1062.04	10.5033			1228.56	16.8163			1351.96	37.7968			1441.6	190.668			1517.54	327.222
42.9785	15.796			105.285	59.853			136.525	166.173			166.927	224.954			129.611	313.443			211.363	328.157
21.9039	53.8648			69.3376	172.34			153.333	258.349			216.05	552.814			309.14	521.433			213.063	758.742
310.733	97.3762			559.827	124.523			813.924	352.516			937.094	663.133			1030.03	1176.57			978.999	1298.68
301.043	14.859			614.036	15.2935			882.653	13.2484			995.139	14.995			1377.46	22.5737			1392.36	33.6544
536.835	39.7976			1252.83	73.0845			1548.16	130.993			1618.69	202.015			1677.92	263.249			1722.45	282.837
398.113	12.0097			816.114	125.654			1189.12	241.304			1294.26	402.8			1404.59	535.347			1502.78	561.104
140.775	9.39785			264.448	52.1589			373.025	97.3486			401.366	137.95			454.767	138.148			499.512	160.521
58.9386	46.1019			223.471	201.69			430.426	367.821			538.457	434.018			488.399	489.748			565.962	534.585
	10.388				114.475				143.018				182.907				239.743				290.88
	25.1723				154.004				390.641				600.245				726.473				705.632
	p value				p value				p value				p value				p value				p value
Mann-Whitney U	0.003993			Mann-Whitney U	0.003216			Mann-Whitney U	0.003993			Mann-Whitney U	0.005119			Mann-Whitney U	0.011217			Mann-Whitney U	0.011217
Figure 3O
EPSC amplitude at 0.75 mW/mm2				EPSC amplitude at 1.5 mW/mm2				EPSC amplitude at 2.3 mW/mm2				EPSC amplitude at 3 mW/mm2				EPSC amplitude at 3.6 mW/mm2				EPSC amplitude at 4.0 mW/mm2
control	PFFs			control	PFFs			control	PFFs			control	PFFs			control	PFFs			control	PFFs
241.6	365.892			385.8	444.062			628.982	485.651			769.736	469.455			828.793	516.99			677.326	643.858
174.341	156.578			337.473	249.654			422.855	356.37			492.935	470.299			603.804	540.251			651.603	649.278
431.633	101.212			627.426	183.357			908.889	363.234			954.119	547.736			1031.75	582.153			1032.78	649.054
38.7347	128.787			109.269	211.956			185.004	283.74			242.889	301.806			229.371	337.483			295.971	355.485
103.224	7.83487			254.853	6.59626			403.872	27.6092			521.3	57.3999			586.8	32.0644			686.985	47.2285
265.606	32.5135			661.202	211.752			931.368	278.477			1027.37	321.459			1110.61	373.533			1113.36	383.097
40.4249	225.986			71.6663	409.054			158.034	786.286			145.017	943.035			242.255	1046.4			289.426	1041.84
89.6123	101.638			182.155	218.147			229.02	355.729			300.646	506.172			334.468	538.039			419.95	538.126
5.49076	80.5111			13.5135	148.325			22.1711	158.743			29.1163	214.298			51.9569	251.972			65.7226	375.664
16.4553	294.635			55.071	611.277			47.3441	865.412			59.5443	1085.97			67.4127	1240.65			105.123	1274.7
114.603	81.2603			239.005	155.583			229.604	170.293			205.294	184.896			179.577	251.878			248.907	253.501
83.7745	100.195			183.283	453.827			295.116	831.989			395.767	808.837			440.66	783.426			496.626	879.195
21.3238	333.346			34.6402	653.788			48.8075	928.448			77.569	1066.6			94.3974	1203.23			107.972	1109.78
19.6007	40.8247			35.228	370.55			17.1582	506.679			28.7677	523.427			16.4802	564.349			21.3106	615.026
45.5726	47.9166			204.663	184.97			265.31	299.937			403.409	399.323			459.073	487.874			467.568	512.188
16.129	22.2564			26.424	121.164			43.5357	199.086			63.697	249.035			72.4492	276.637			98.824	322.559
100.004	27.1548			90.298	210.383			116.881	356.292			200.144	529.079			205.879	611.51			287.406	586.872
9.23435	67.9925			71.2397	116.729			105.053	207.647			123.851	381.024			159.584	487.045			149.702	581.053
117.996	63.9966			177.75	172.171			252.747	317.03			307.725	376.418			401.202	406.128			442.916	406.937
497.862	205.804			846.844	415.565			1035.91	700.98			1132.32	750.973			1121.27	855.051			977.445	935.603
218.631	91.3476			598.179	275.285			911.1	423.404			1120.51	488.191			1375.78	496.337			1444.14	524.673
579.304	18.1632			989.125	143.815			1442.85	273.332			1638.02	317.535			1730.26	421.762			1762.33	538.543
50.3771	190.538			549.033	329.122			1353.47	395.643			1559.31	441.177			1720.81	600.493			1863.63	664.909
37.1825	125.034			123.483	222.259			120.735	393.951			135.826	545.367			133.724	666.942			150.499	750.288
113.28	25.5209			180.698	147.605			231.303	214.499			316.859	209.156			325.313	234.845			318.687	308.075
707.38	297.873			988.079	562.73			1092.11	601.513			1113.98	752.354			1263.34	902.766			1287.72	972.752
441.835	67.4015			630.227	314.696			803.685	551.149			939.78	678.732			1145.81	804.412			1210.53	933.83
171.268	249.448			366.144	607.977			486.041	892.412			566.185	939.158			524.578	1055.48			572	1070.88
	p value				p value				p value				p value				p value				p value
Mann-Whitney U	0.941691			Mann-Whitney U	0.897755			Mann-Whitney U	0.897755			Mann-Whitney U	0.897755			Mann-Whitney U	0.897755			Mann-Whitney U	0.897755
