# Supplementary material for: Synaptic location is a determinant of the detrimental effects of α-synuclein pathology to glutamatergic transmission in the basolateral amygdala
Source: eLife. 2022 Jul 1;11:e78055. doi: 10.7554/eLife.78055 (PMC9286736; doi:10.7554/eLife.78055)
Supplement: Figure 4—source data 1. [file elife-78055-fig4-data1.xlsx]

## Sheet: Figure 4
vGluT1 density				PPR_electric stimulation			PPR_optogenetic stimulation			Sr2+-EPSCs_frequency				Sr2+-EPSCs_amplitude			AMPA/NMDA ratio			AMPA rectification
Figure 4C				Figure 4E			Figure 4G			Figure 4I				Figure 4J			Figure 4L			Figure 4M
control	PFF			control	PFF		control	PFF		control	PFF			control	PFF		control	PFF		control	PFF
35.9893	24.3293			1.1795	1.12235		0.633119	1.23113		24.4	21.2			21.13	18.82		1.91805	0.803103		1.31191	4.53993
35.2869	29.2936			1.2378	0.871178		0.725066	0.610678		35.2	13.2			21.08	15.66		0.785858	0.744039		2.95971	2.55539
19.1777	44.8688			1.4099	1.32949		0.935087	0.849615		39.2	4.6			17.77	12.83		1.19788	1.2563		2.18189	1.68008
23.7803	37.5882			1.3206	1.16845		0.5994	1.11299		40.4	48.8			21.13	22.84		1.00606	1.46641		2.21633	1.56574
31.4514	29.9172			1.0144	0.933193		1.50149	0.620485		27.6	30.8			19.68	28.63		1.46057	0.930943		2.09379	1.97268
29.15	29.0368			1.1793	1.16573		0.774073	0.550409		60.4	31.6			26.09	16.17		1.16832	1.08391		2.15478	1.84837
26.0816	13.0408			1.345	0.996208		0.578397	0.776087		41.2	17.6			22.82	14.4		2.01597	1.03741		1.28727	2.07257
29.9172	41.4237			1.1268	1.28593		0.59507	0.518522		97.6	34.8			34.49	18.8		1.77481	0.775022		1.43799	3.17108
18.4106	9.2584			1.3451	1.31371		0.684426	0.773298		17.6	6			19.35	16.7		3.00084	0.817237		0.788145	2.18743
18.9873	16.3014			0.8634	1.69		0.654855	0.566917		16.4	6			16.83	30.28		1.27976	0.807105		1.16342	2.53872
34.1925				1.56	2.99		0.59045	0.792609		28	10			16.6	16.21		1.04141	0.617757		1.79901	2.96017
				2.21	2.16		0.746313	0.742036		24.8	15.2			15.47	15.65		1.20853	1.22347		1.63761	1.63939
p value	0.987			1.93	1.55206		0.887223	0.6349		28	34.4			15.67	18.76		1.54865	0.904904		1.58629	2.3902
				1.69	1.85484		0.651889	0.80959		14.4	16.4			14.57	17.98		2.00713	0.787726		1.39824	2.13667
				1.86537	1.96928		0.486877	0.841594		18	20.4			19.41	14.03		0.846004	1.72411		2.32528	1.32711
				2.08903	1.60465		0.501778	1.11369		10.4	22.4			13.88	23.26		1.27536	1.18697		1.58781	1.35656
				1.481	2.07304		0.896765	0.560261		25.6	7.2			18.39	12.87		1.45828	0.853649		1.58807	1.9524
				1.31523	1.45618		0.609188	1.88711		8	8.4			14.24	25.24		1.64997	1.50466		2.96169	1.81636
				1.33319			0.365113	0.386947		18	8.4			14.05	13.62		1.7095			1.22613
							0.626158	0.566311		75.6	20			25.12	15.34		2.90975			1.02606
				p value	0.99		0.497592	0.221061		16.8	38.8			24.12	14.3
							0.442232	0.454771		39.2	14.4			18.25	14.4		p value	0.001		p value	0.035
							0.590519	0.383523		18.4	8			15.11	16.9
							0.514686	0.278065		16	14.8			15.56	20.28
							0.498655	1.78411
							0.504648	0.431187		p value	0.01			p value	0.3
							0.56095	0.274514
							1.10517	0.441847
							0.3919	0.441677
							0.471834	0.46452
							0.474633	0.323113
							0.507841
							0.505349
							0.586627
							0.63842
							p value	0.83
