# Supplementary material for: Synaptic location is a determinant of the detrimental effects of α-synuclein pathology to glutamatergic transmission in the basolateral amygdala
Source: eLife. 2022 Jul 1;11:e78055. doi: 10.7554/eLife.78055 (PMC9286736; doi:10.7554/eLife.78055)
Supplement: Figure 5—source data 1. [file elife-78055-fig5-data1.xlsx]

## Sheet: Figure 5
Figure 5C			Figure 5D				Figure 5G			Figure 5H
PBS	PFFs		PBS	PFFs			PBS	PFFs		PBS	PFFs
1202.93	724.171		90	30			636.633	304.362		0.782609	0.766667
1149.32	547.256		96.4	26.9			940.649	755.364		0.92	0.73913
709.833	917.116		90.9	19			609.284	276.371		0.884615	0.642857
904.63	627.034		95.5	23.8			663.64	1143.51		0.923077	0.8
805.26	797.774		71.4	30			984.562	1584.05		0.818182	0.73913
788.021	847.78		66.67	26.7			805.031	1249.12		0.92	0.730769
1314.26	453.094						656	1193.57		0.84	0.714286
1040.61	487.268			p value			409.327	695.127		0.791667	0.7
1158.5	690.357		Mann-Whitney U	0.0022			1014.32	1128.11		0.913043	0.727273
1102.39	548.169						1147.03	1142.32		0.9	0.73913
787.379	556.867						787.831	1351.01		0.833333	0.857143
917.869	699.492						455.56	624.028		0.909091
929.865	657.341						1260.68	1017.17
969.7	489.362						1031.23	947.005		p value	<0.0001
1644.13	522.088						196.833	1113.54
1043.45	894.345						571.423	834.039
881.206	743.982						1492.8	81.351
830.971	695.382						1310.44	780.015
1229.41	750.264						930.578	734.926
845.807	1329.57						304.957	1274.86
923.985	987.97
731.328	508.936						968.753	978.086
964.442	816.719						437.047	837.512
798.423	922.795						958.936	703.102
755.167	676.356						813.039	971.12
797.929	896.117						928.636	1384.14
529.594	1039.07						2299.94	408.922
749.941	390.267						1367.03	1121.31
419.621	592.976						451.042	969.647
806.974	954.814						1589.49	1192.91
683.97	561.556						1258.14	933.737
895.212	682.662						978.908	215.088
550.978	804.971						1320.92	1458.81
900.289	636.324						1539.21	1035.39
867.425	661.429						1096.51	665.755
1016.26	410.056						1648.23	1333.72
941.828	574.173						1421.66	400.107
942.486	563.714						857.391	1177.82
877.663	597.548						1042.53	939.982
670.239	722.273						564.516	1627.37
1873.62	754.397						1304.87	612.477
1793.12	681.3
853.212	714.651						670.081	200.331
1232.62	1007.14						35.15	171.71
1266.36	609.667						339.671	343.571
939.938	961						1138.84	167.611
1020.21	783.033						537.103	114.5
1515.23	817.245						701.049	360.684
1038.16	735.676						171.589	168.332
1235.44	510.431						1752.91	249.401
1109.45	256.135						864.068	111.429
1736.19	557.714						1177.64	212.331
1785.47	624.389						1065.77	176.587
931.324	635.897						378.898	196.102
1501.35	844.385						1234.8	144.669
2154.47	638.548						1676.58	247.252
1286.84	594.333						793.667	312.778
1821.25	667.271						702.399	205.981
1286.65	834.182						983.849	103.717
1606.04	546.559						750.545	68.919
1923.47	621.413						1117.59	214.356
1599.39	696.023						1012.13	199.03
1498.58	596.75						1324.06
1126.88	516.208							771.779
2170.47	429.787						1439.14	928.756
1471.03	549.344						575.322	1197.75
2133.61	507.917						904.373	770.101
2387.11	642.744						898.09	648.702
1811.23	628.455						1549.96	481.474
1915.24	408.692						876.17	1327.49
1293.64	527.261						1614.19	764.437
973.92	449.093						1093.53	562.562
1689.48	682						2462.32	915.107
1083.82	598.811						1230.45	820.543
1574.15	477.862						1124.67	555.957
759.652	453.978						2160.58	1125.14
1280.23	436.654						809.846	1148.04
1578.6	586.867						693.165	518.997
1943.88	632.031						1199.97	1234.09
1914.24	571.674						1549.97	877.648
420.133	505.46						1375.6	825.084
506.446	529.961						1094.43	803.459
531.467	434						1154.19	1518.96
351.611	380.512						1906.66
494.879	499.483							103.503
285.314	383.344						1097.55	326.703
349.88	451.25						439.417	232.298
382.54	486.244						735.122	113.508
297.645	390.292						554.307	263.286
579.896	383.629						722.54	112.262
397.463	514.407						1121.4	580.421
358.405	375						340.49	223.803
433.25	416.735						692.584	245.403
474.25	474.738						845.889	453.232
408.425	407.829						451.655	174.171
391.737	342.171						885.224	294.417
540.966	691.877						605.729	488.866
433.312	464.784						830.94	275.613
634.158	367.447						779.288	296.168
399.5	513.136						1053.83	728
							648.437	126.781
							496.919	285.182
	p value						1162.28	179.115
Mann-Whitney U	<0.0001						980.272	266.718
							508.477
								605.586
							482.973	1414.08
							804.361	534.398
							570.818	736.025
							1188.48	907.345
							1094.97	729.663
							837.009	610.967
							726.957	1042.05
							1130.66	1091.76
							648.454	634.219
							1051.33	389.777
							758.188	473.049
							894.816	254.096
							1247.21	489.96
							1204.64	574.583
							841.782	1271.72
							565.587	652.455
							1486.65	1377.33
							1041.23	618.917
							559.139	343.206
							739.335
								991.504
							188.596	659.319
							294.071	424.329
							343.75	330.689
							372.426	772.049
							479.045	751
							718.3	299.412
							308.945	294.405
							334.794	308.174
							368.271	607.897
							393.523	1344.33
							419.514	578.53
							215.502	442.654
							338.218	294.019
							373.52	312.192
							328.454	813.931
							190.005	826.278
							283.769	673.551
							263.317	621.166
							465.215	702.57
							258.348
								213.667
							1307.2	569.604
							1204.28	485.39
							1461.37	108.228
							648.05	230.644
							514.021	148.025
							287.703	233.272
							691.912	370.525
							1087.1	71.584
							456.794	541.732
							573.043	162.623
							718.564	345.958
							1335.62	399.393
							707.189	382.047
							617.025	622.982
							768.176	564.919
							540.275	61.247
							1313.11	296.624
							1191.1	672.535
							966.56	499.259
							616.694
								553.713
							667.281	806.398
							986.12	944.156
							1148.1	346.464
							1269.75	460.817
							1467.4	443.583
							772.462	588.838
							1014.26	733.688
							1278.58	423.112
							1488.1	1236.8
							772	286.88
							468.685	733.739
							993.376	636.855
							975.733	1309.15
							1068.81	558.915
							876.132	900.115
							700.124	523.556
							1015.49	553.57
							855.681	746.302
							690.352	48.284
							840.085	644.408
							1957.77	433.977
							420.597	98.913
							688.602	975.914
							1304.21	599.724
							585.897	433.977
							1132.36	705.906
							1366.64	961.469
							536.496	1122.29
							742.204	1010.55
							1406.32	1091.14
							1080.84	554.97
							1359.15	2007.73
							1403.3	455.286
							1419.64	1353.03
							2776.16	374.675
							1411.86	687.22
							1566.34	746.151
							917.464	723.299
							817.371	573.256
							714.863	384.113
							1468.26
							1425.65
							915.623
							1063.55
							736.789
							1025.01
							1627.21
							1173.28
							1092.61
							976.742
							900.86
							1345.15
							1094.63
							1102.58
							782.087
							500.848
							653.864
							1105.44
							881.943
							549.574
							1289.48
							1233.13
							2318.17
							1883.05
							1323.48
							1207.33
							1245.16
							1684.85
							972
							1247.57
							508.007
							2093.72
							1299.29
							1159.53
							772.254
							1254.87
							1622.88
							887.853
							1014.42
							1704.75
							p value	<0.0001
