# Supplementary material for: Synaptic location is a determinant of the detrimental effects of α-synuclein pathology to glutamatergic transmission in the basolateral amygdala
Source: eLife. 2022 Jul 1;11:e78055. doi: 10.7554/eLife.78055 (PMC9286736; doi:10.7554/eLife.78055)
Supplement: Figure 6—figure supplement 1—source data 1. [file elife-78055-fig6-figsupp1-data1.xlsx]

## Sheet: Sheet1
Figure 6 - figure supplement 1
ratio EPSC2/EPSC1			ratio EPSC5/EPSC1			ratio EPSC10/EPSC1			ratio EPSC50/EPSC1			ratio EPSC100/EPSC1			ratio EPSC150/EPSC1			ratio EPSC200/EPSC1			ratio EPSC250/EPSC1			ratio EPSC300/EPSC1
WT control	synKO		WT control	synKO		WT control	synKO		WT control	synKO		WT control	synKO		WT control	synKO		WT control	synKO		WT control	synKO		WT control	synKO
1.81962	1.43918		0.866425	1.24821		0.807813	0.99313		0.520914	0.169343		0.336766	0.131635		0.371679	0.0840799		0.242222	0.140306		0.174274	0.0861212		0.15871	0.102091
1.26429	1.36482		1.02964	0.74671		1.53679	0.972105		1.07291	0.281523		0.622876	0.18191		0.520566	0.142555		0.367763	0.112657		0.777709	0.0746093		0.393986	0.0886202
1.51707	1.86881		1.49986	0.928144		1.10707	1.06997		0.393338	0.365959		0.166942	0.141823		0.138815	0.151199		0.107559	0.151055		0.160137	0.0581407		0.0812968	0.0515856
2.26804	1.9893		1.66294	0.339472		1.21533	0.218503		0.63762	0.0672607		0.494585	0.0899712		0.368547	0.106201		0.43479	0.129831		0.238427	0.101773		0.35215	0.0401509
0.857403	1.78016		0.838967	1.54019		0.680901	0.987934		0.319426	0.627212		0.316434	0.325506		0.226227	0.415417		0.24186	0.331667		0.104798	0.368042		0.0770271	0.395659
2.01391	1.10324		1.603	0.852615		0.976182	0.799908		0.337428	0.379815		0.147487	0.319405		0.134487	0.345322		0.154799	0.277041		0.073522	0.285801		0.047961	0.154224
1.5266	1.13264		1.55502	1.11125		1.27863	0.951083		0.156217	0.559757		0.0770683	0.4874		0.0261154	0.513355		0.0290375	0.289326		0.0100319	0.248014		0.0191353	0.260083
1.05317	1.46088		0.811328	1.13374		0.685749	0.582881		0.220909	0.117474		0.0511282	0.102655		0.100191	0.0936598		0.0576524	0.0403556		0.0470936	0.046011		0.060053	0.0250585
0.386579	1.061		0.175825	0.796		0.19296	0.866		0.0601065	0.418		0.0437536	0.331		0.0214387	0.218		0.0158806	0.233		0.0151334	0.228		0.013999	0.227
	p value			p value			p value			p value			p value			p value			p value			p value			p value
Mann-Whitney U	>0.999999		Mann-Whitney U	0.44		Mann-Whitney U	0.49		Mann-Whitney U	0.79		Mann-Whitney U	0.93		Mann-Whitney U	0.79		Mann-Whitney U	0.79		Mann-Whitney U	0.55		Mann-Whitney U	0.55
