# Supplementary material for: Synaptic location is a determinant of the detrimental effects of α-synuclein pathology to glutamatergic transmission in the basolateral amygdala
Source: eLife. 2022 Jul 1;11:e78055. doi: 10.7554/eLife.78055 (PMC9286736; doi:10.7554/eLife.78055)
Supplement: Figure 6—source data 1. [file elife-78055-fig6-data1.xlsx]

## Sheet: Figure 6
Figure 6A2
ratio EPSC2/EPSC1			ratio EPSC5/EPSC1			ratio EPSC10/EPSC1			ratio EPSC50/EPSC1			ratio EPSC100/EPSC1			ratio EPSC150/EPSC1			ratio EPSC200/EPSC1			ratio EPSC250/EPSC1			ratio EPSC300/EPSC1
control	PFFs		control	PFFs		control	PFFs		control	PFFs		control	PFFs		control	PFFs		control	PFFs		control	PFFs		control	PFFs
1.36937	1.29474		1.3658	1.56624		1.32558	1.39822		0.819875	0.684175		0.535736	0.442058		0.499468	0.274431		0.500076	0.211461		0.401992	0.147808		0.430885	0.0774393
1.78771	0.948819		1.418	0.464772		1.37349	0.427406		1.16669	0.147227		0.875991	0.194132		0.499085	0.118611		0.269723	0.151832		0.254237	0.0970929		0.172418	0.0894733
0.967502	1.1442		0.885182	0.876155		0.752119	0.728076		0.419155	0.258		0.305934	0.370331		0.28001	0.183693		0.363927	0.0958629		0.310112	0.107176		0.204816	0.103976
1.47978	0.992424		1.06661	0.817952		1.09027	0.701567		0.705819	0.140741		0.653319	0.043575		0.454695	0.0975944		0.386212	0.0239706		0.237415	0.036127		0.229054	0.0242702
1.00128	1.14364		1.22027	1.27207		0.895767	1.06404		0.317828	0.305423		0.296793	0.148893		0.152458	0.101668		0.283198	0.0841508		0.234117	0.0821889		0.114322	0.0693543
1.58249	1.22871		1.19276	1.20335		1.37348	1.47242		0.606283	0.70306		0.411419	0.58306		0.190946	0.363825		0.107081	0.206011		0.149811	0.173661		0.127684	0.0903997
1.36636	1.35158		1.5676	1.29576		1.86429	1.30053		1.13519	0.861076		0.74874	0.353084		0.687799	0.285045		0.466072	0.114821		0.33301	0.125868		0.315949	0.0654489
1.10626	1.22298		0.858039	1.08493		0.836516	1.13199		0.171224	0.6539		0.0836629	0.256302		0.0231047	0.292978		0.0310699	0.107757		0.0691447	0.140734		0.0381313	0.111825
1.22746	1.12625		1.13095	1.12622		1.15689	0.880508		0.625111	0.743108		0.574786	0.368916		0.415607	0.277253		0.412984	0.190681		0.272502	0.215204		0.243497	0.164324
1.27721	1.16221		1.18154	1.08069		1.00961	1.39728		0.34658	0.546319		0.132156	0.192663		0.222209	0.187267		0.0572081	0.0469613		0.0784336	0.0417577		0.0298242	0.0347687
1.10901	0.93758		0.856953	0.896599		0.869088	0.819054		0.196628	0.169875		0.0536389	0.0552089		0.0563193	0.00983272		0.0937023	0.0182816		0.0541865	0.012212		0.0262574	0.0241338
1.13616	1.0497		0.870989	1.00866		0.869829	0.96548		0.216265	0.114506		0.0802938	0.0794493		0.0848692	0.0328408		0.0362804	0.0429819		0.0586416	0.0241773		0.0516175	0.0166347
1.10956	1.89614		1.22175	1.52474		1.20248	1.5713		0.302584	0.369027		0.264163	0.0434916		0.180139	0.0375086		0.147241	0.0694178		0.056957	0.0452558		0.0534585	0.0149676
1.18392			1.13199			1.21441			0.516407			0.495894			0.431297			0.23758			0.206938			0.239937
0.992999			0.762225			0.745679			0.552784			0.332103			0.238294			0.132699			0.148534			0.100755
	p value			p value			p value			p value			p value			p value			p value			p value			p value
Mann-Whitney U	0.52		Mann-Whitney U	0.93		Mann-Whitney U	0.93		Mann-Whitney U	0.41		Mann-Whitney U	0.118		Mann-Whitney U	0.129		Mann-Whitney U	0.036		Mann-Whitney U	0.014		Mann-Whitney U	0.019
Figure 6B2
ratio EPSC2/EPSC1			ratio EPSC5/EPSC1			ratio EPSC10/EPSC1			ratio EPSC50/EPSC1			ratio EPSC100/EPSC1			ratio EPSC150/EPSC1			ratio EPSC200/EPSC1			ratio EPSC250/EPSC1			ratio EPSC300/EPSC1
WT control	synKO		WT control	synKO		WT control	synKO		WT control	synKO		WT control	synKO		WT control	synKO		WT control	synKO		WT control	synKO		WT control	synKO
1.23732	0.919352		1.18875	0.652416		0.967225	0.466555		0.358814	0.0968952		0.607982	0.0387335		0.517324	0.0175829		0.381409	0.0801134		0.437478	0.0138781		0.413843	0.0146166
1.45586	1.77765		1.48917	1.70919		1.81391	1.08281		1.21397	0.625679		1.27255	0.172087		0.611779	0.106259		0.47045	0.0778017		0.545483	0.165837		0.422222	0.0886343
1.5931	1.01177		1.69299	0.531871		1.50103	0.540523		0.588801	0.0612319		0.349872	0.073729		0.339271	0.0624343		0.315625	0.0735988		0.261759	0.0825371		0.242872	0.190175
1.39722	1.01412		1.36499	0.652199		1.26458	0.716343		0.778762	0.697064		0.620733	0.642976		0.547377	0.57704		0.498499	0.365927		0.325733	0.175693		0.208934	0.251011
1.02758	1.10161		0.965854	0.913886		0.473157	0.754423		0.353353	0.437922		0.279596	0.32568		0.301342	0.291784		0.244338	0.271125		0.192373	0.306347		0.223643	0.292893
1.3812	1.37078		1.17172	0.985799		1.0092	0.585638		0.612784	0.229424		0.416762	0.221163		0.323432	0.155257		0.207228	0.0906248		0.165718	0.026966		0.153316	0.0103211
1.18732	1.7932		1.00046	1.69065		1.11443	1.38229		0.851136	0.170175		0.68743	0.177177		0.475889	0.0164442		0.398382	0.00663861		0.345461	0.010261		0.213777	0.00950181
1.48944	1.13597		1.16925	0.939711		0.937427	0.618828		0.435718	0.0251688		0.26728	-0.0008901		0.168238	0.0148767		0.103311	0.0112014		0.0684755	0.0134301		0.0697204	0.015815
1.67906			0.983398			0.950788			0.319963			0.302602			0.161491			0.0816504			0.0742097			0.0522149
	p value			p value			p value			p value			p value			p value			p value			p value			p value
Mann-Whitney U	0.23		Mann-Whitney U	0.11		Mann-Whitney U	0.07		Mann-Whitney U	0.05		Mann-Whitney U	0.011		Mann-Whitney U	0.011		Mann-Whitney U	0.011		Mann-Whitney U	0.027		Mann-Whitney U	0.11
